# Supplementary material
Source: publisher figshare collection journal article supplement (https://sage.figshare.com/ndownloader/files/44205912)
Supplement: Supplementary file 1 [file 44205912]

## Sheet: Taul1
Supplemental Table 4. Means and standard deviations of PE in different coaching situations according to coaches and young sports participants, and the results of the Independent Samples test
Independent Samples test
	Mean (SD)		SE Mean	F	df	p	95% CI
Young sports participants (n=173)	17.87 (7.914)		0.602	4.589	195	0.004	1.62	8.21
Coach (n=24)	12.96 (5.607)		1.144
SD = Standard Deviation
SE Mean = Std. Error Mean
F = Levene's Test for Equality of Variances
df = degrees of freedom
95 % CI = 95 % Confidence Interval
Minimum-Maximum 0.00-36.00
